# Supplementary material for: Glutaminase 1 expression in colorectal cancer cells is induced by hypoxia and required for tumor growth, invasion, and metastatic colonization
Source: PubMed Central journal article supplement (PMC6426853; doi:10.1038/s41419-018-1291-5), 2019-01-17
Supplement: 41419_2018_1291_MOESM2_ESM.pdf [file 41419_2018_1291_MOESM2_ESM.pdf]

**A**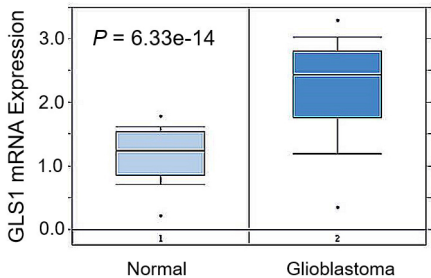**B**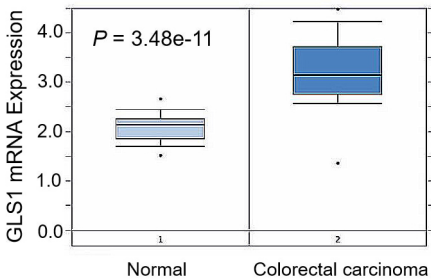**C**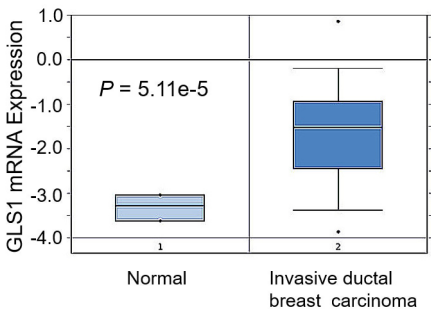**Figure S1**

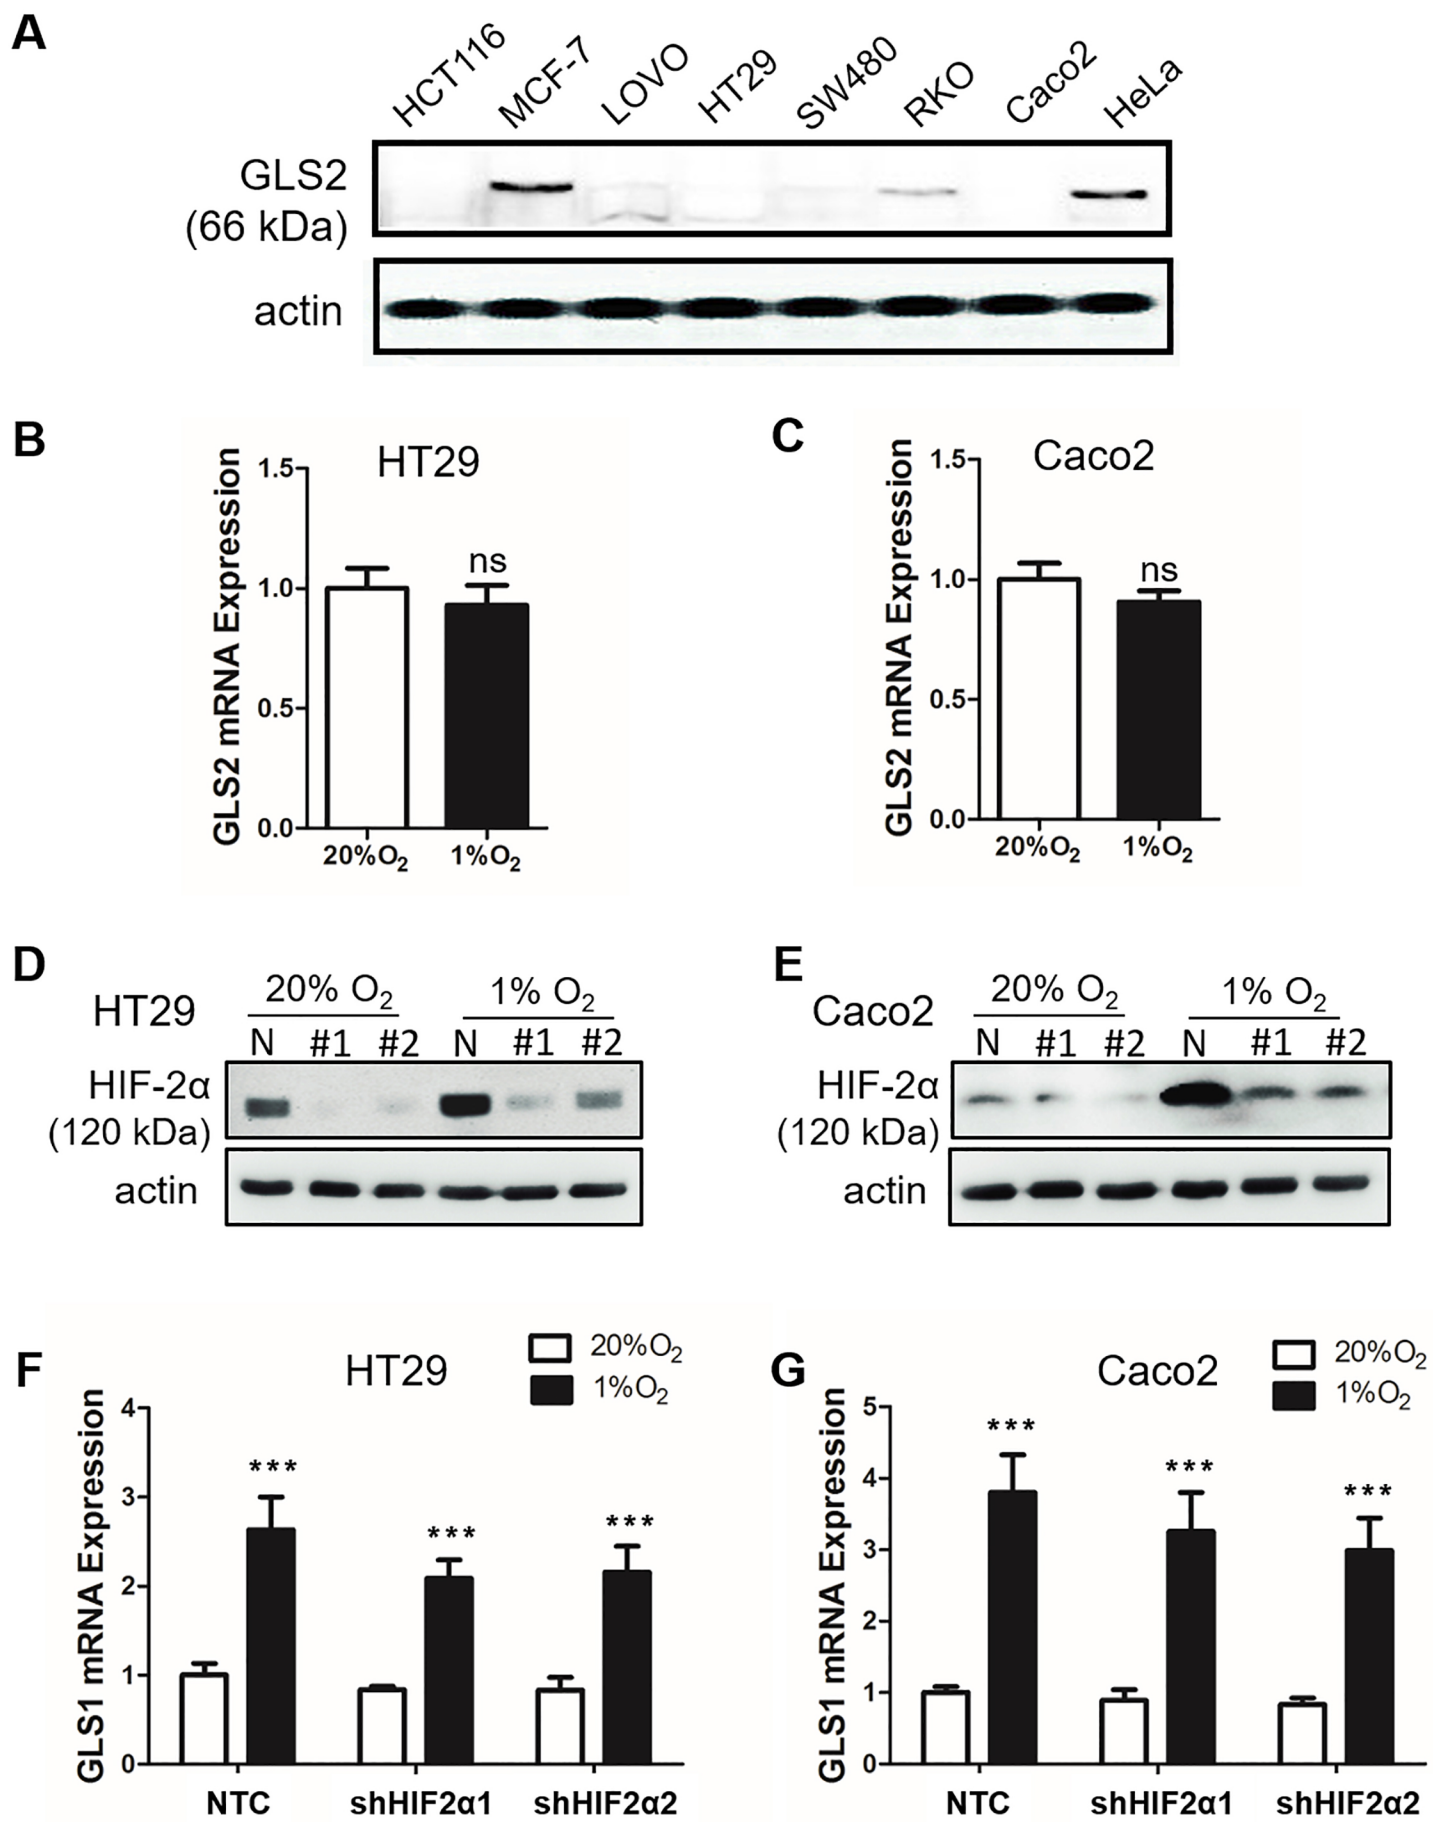

Figure S2

**A**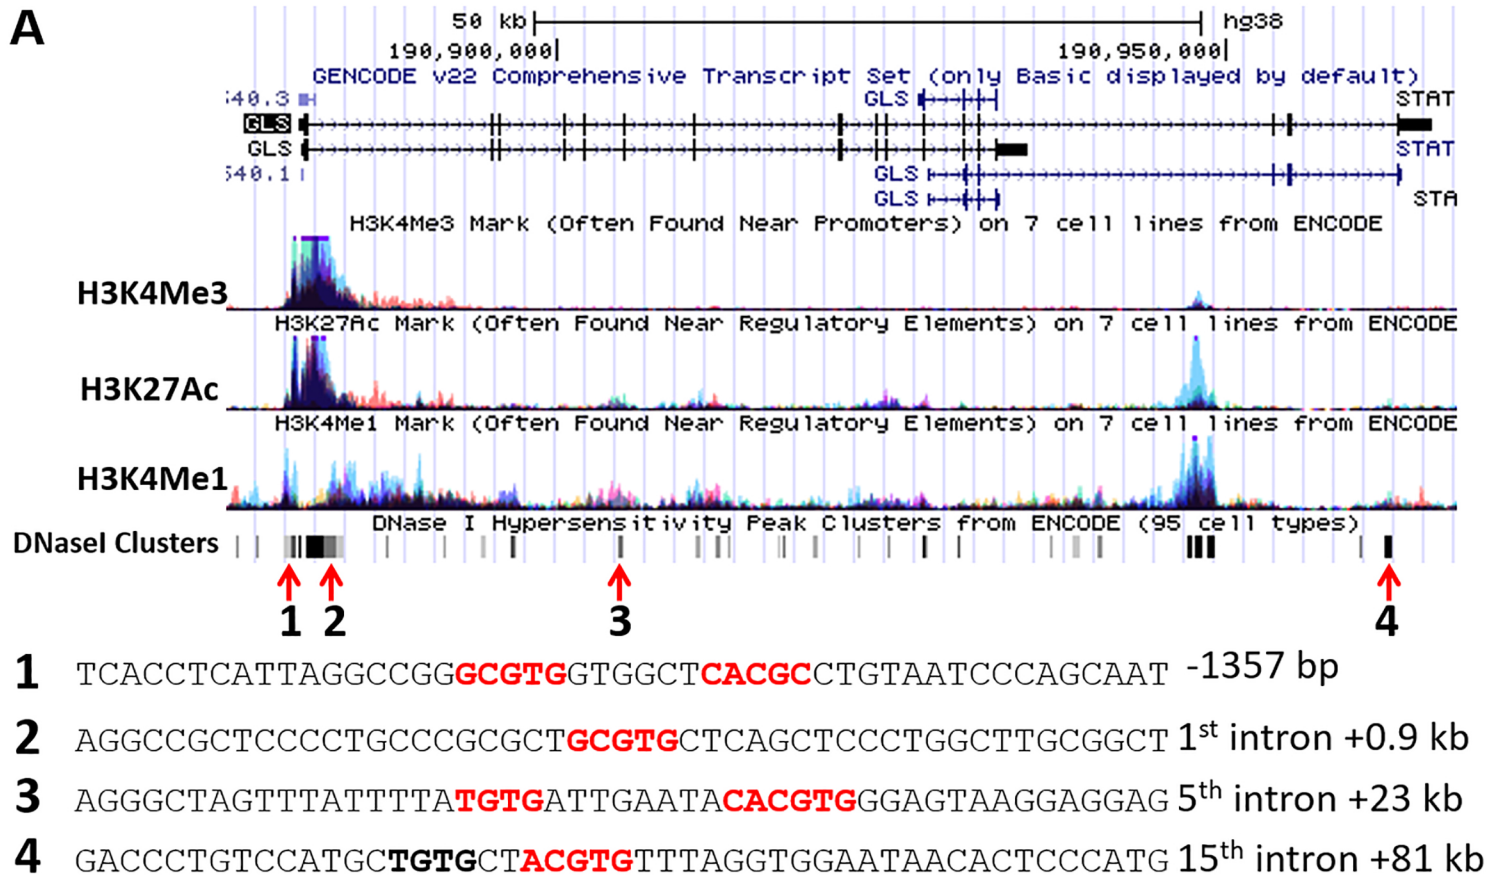**B**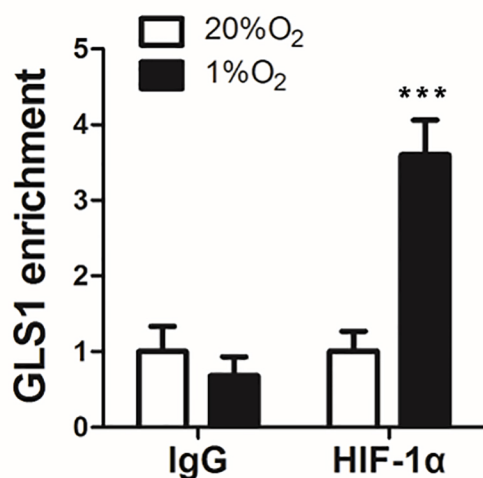**C**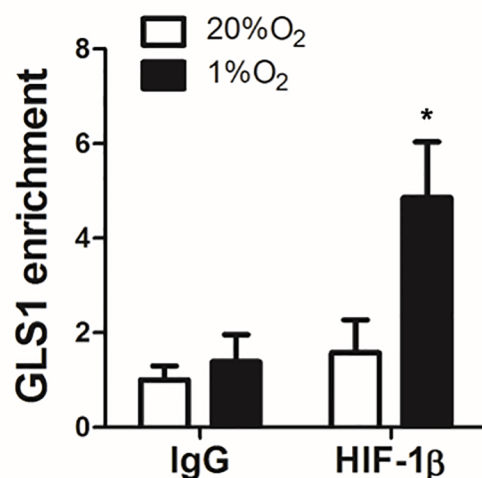**D**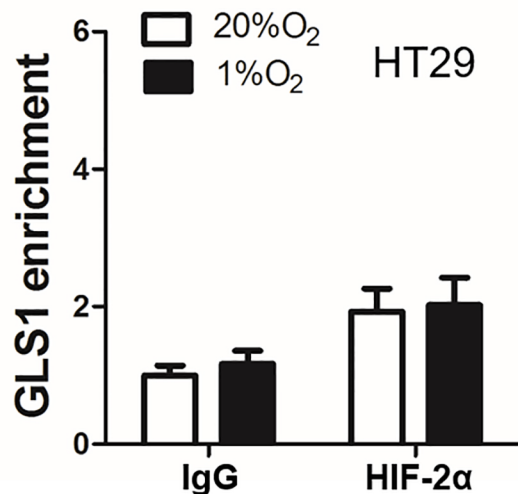**E**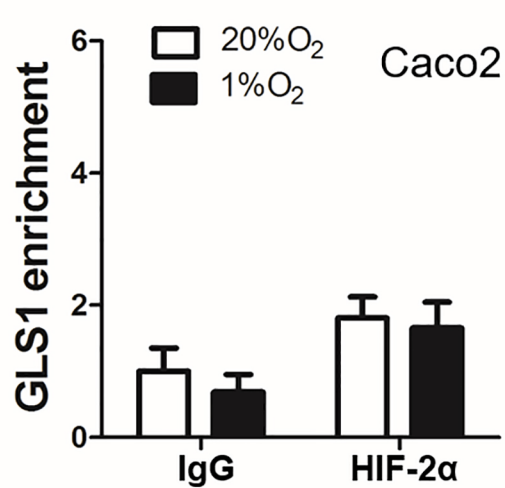

Figure S3

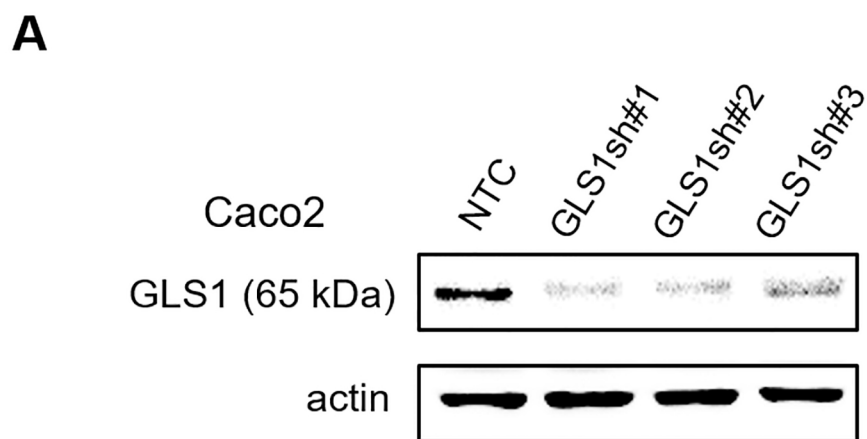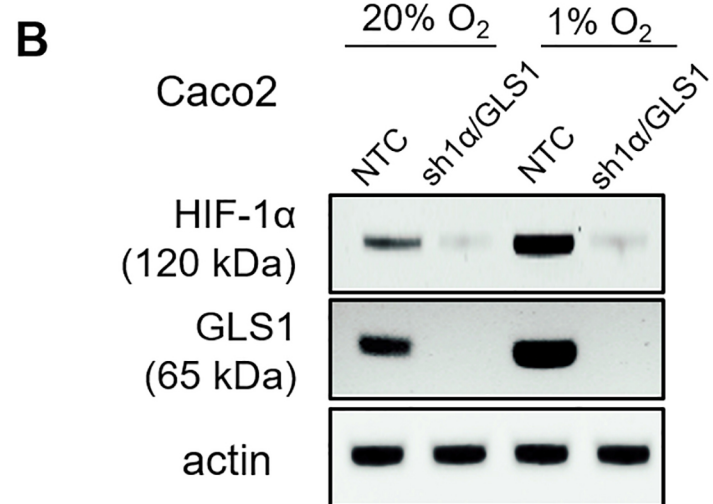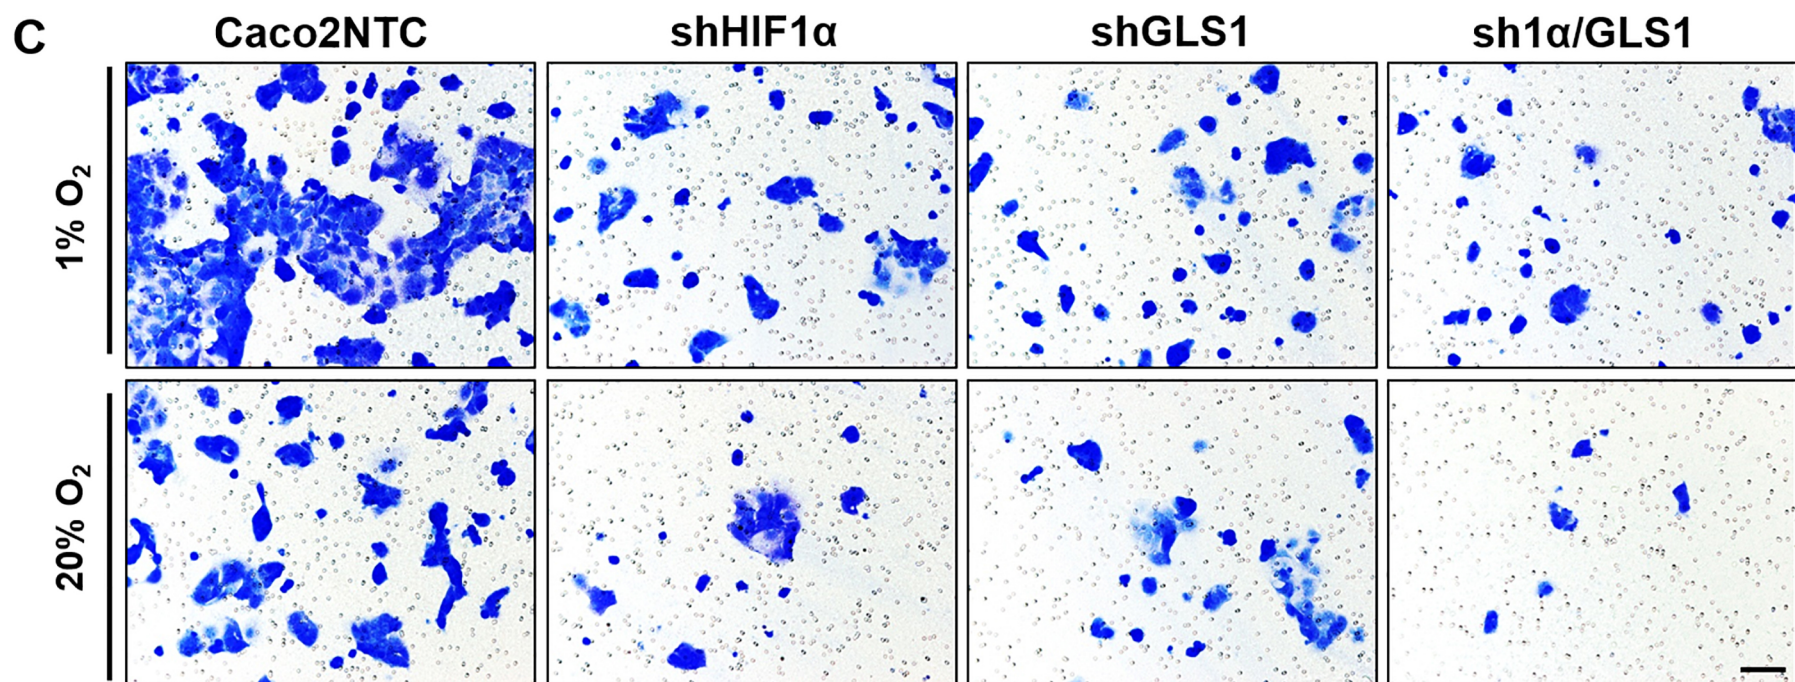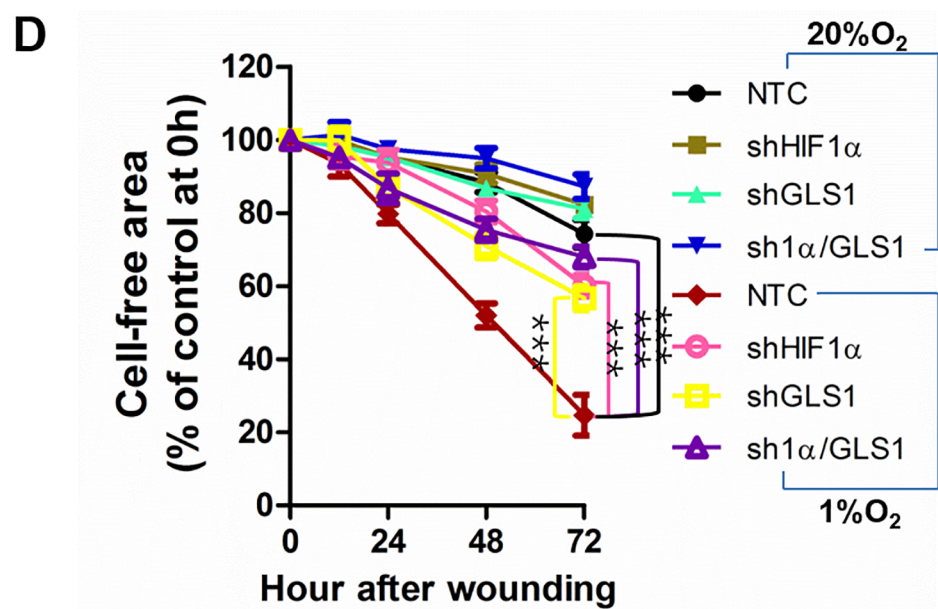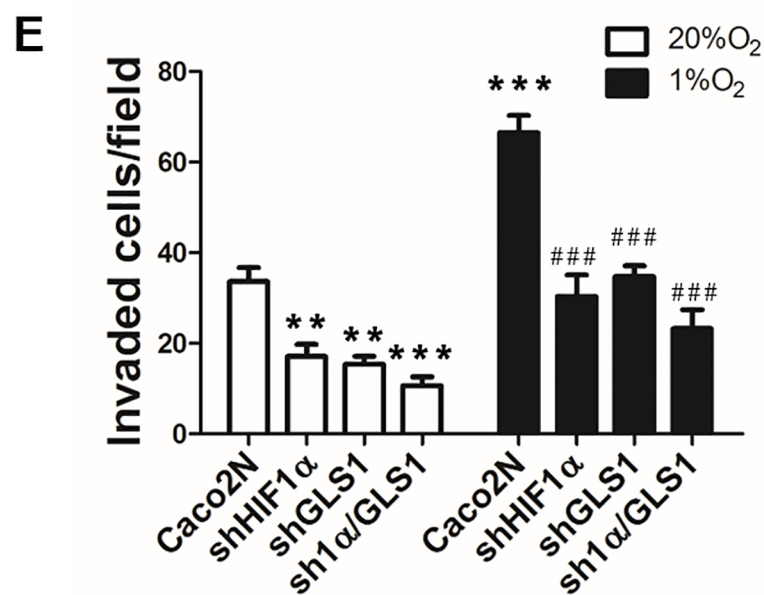

Figure S4

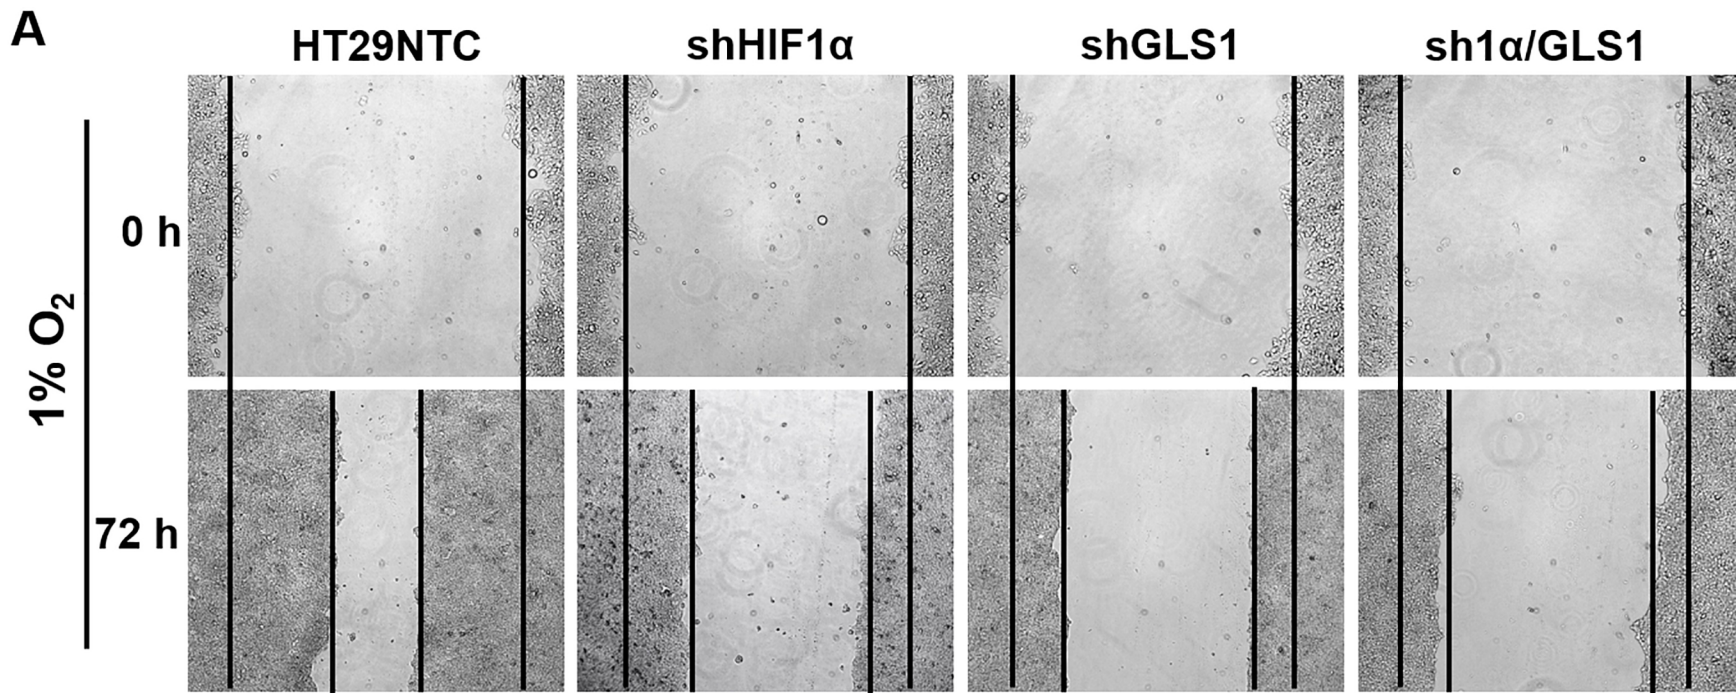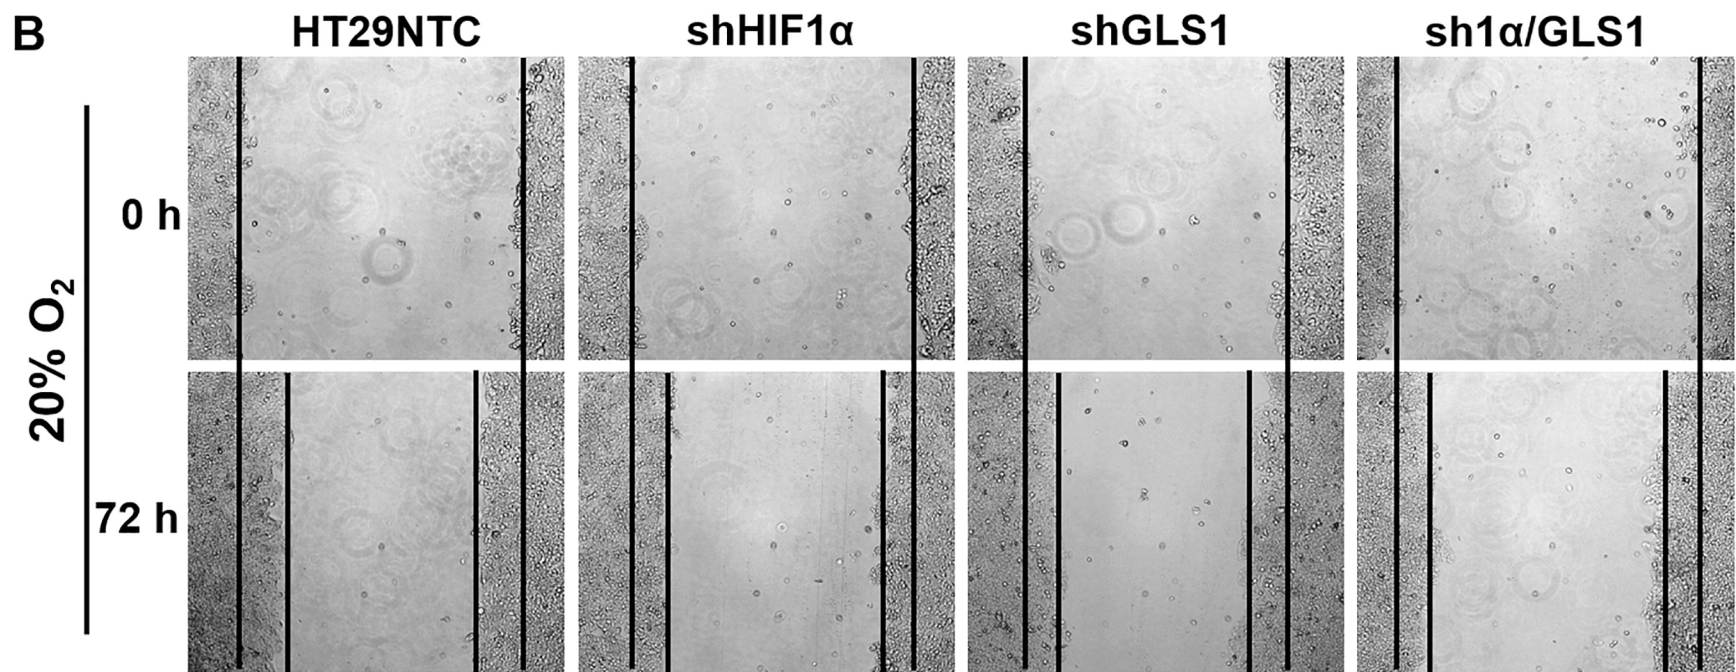

Figure S5

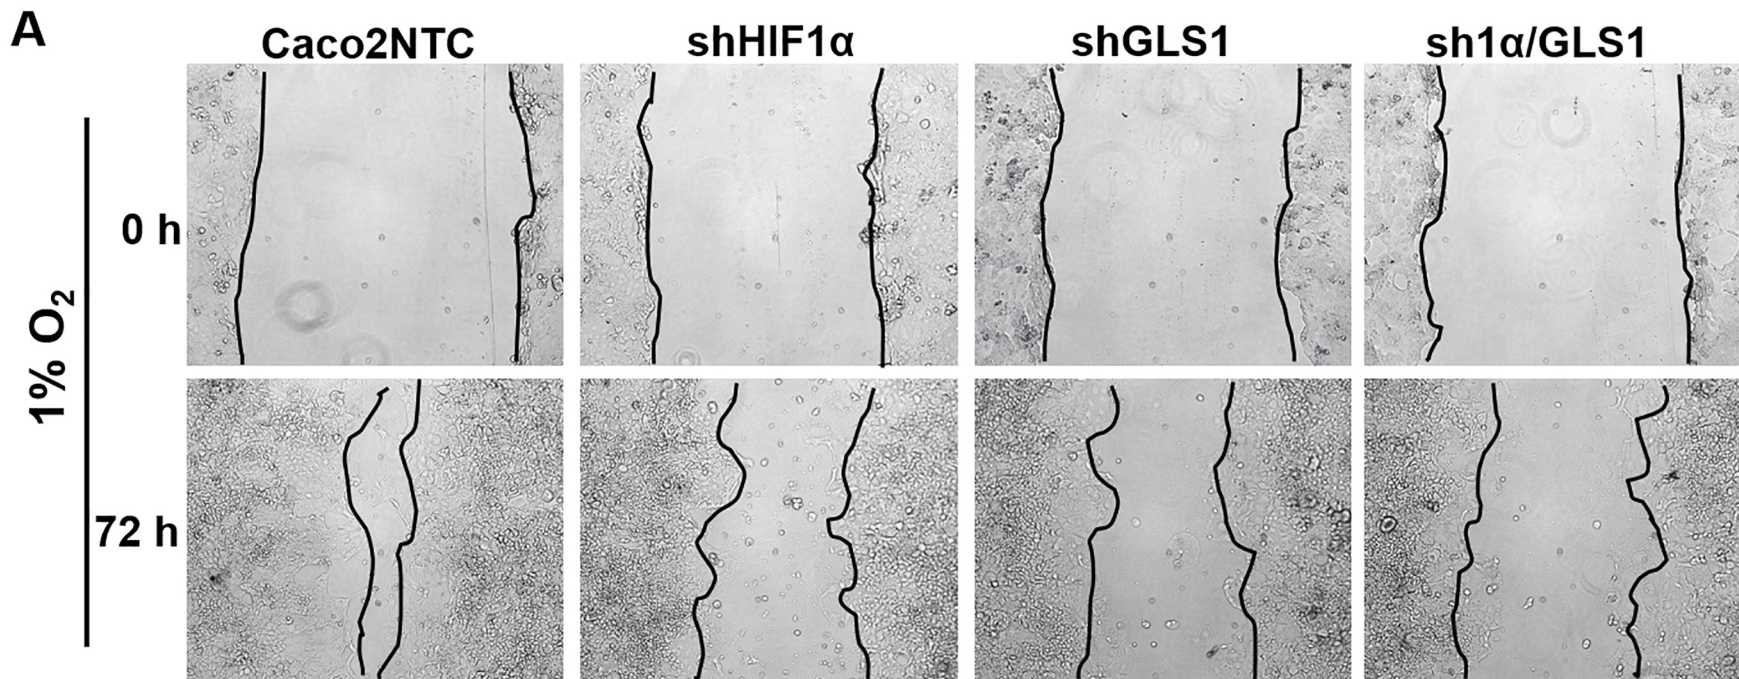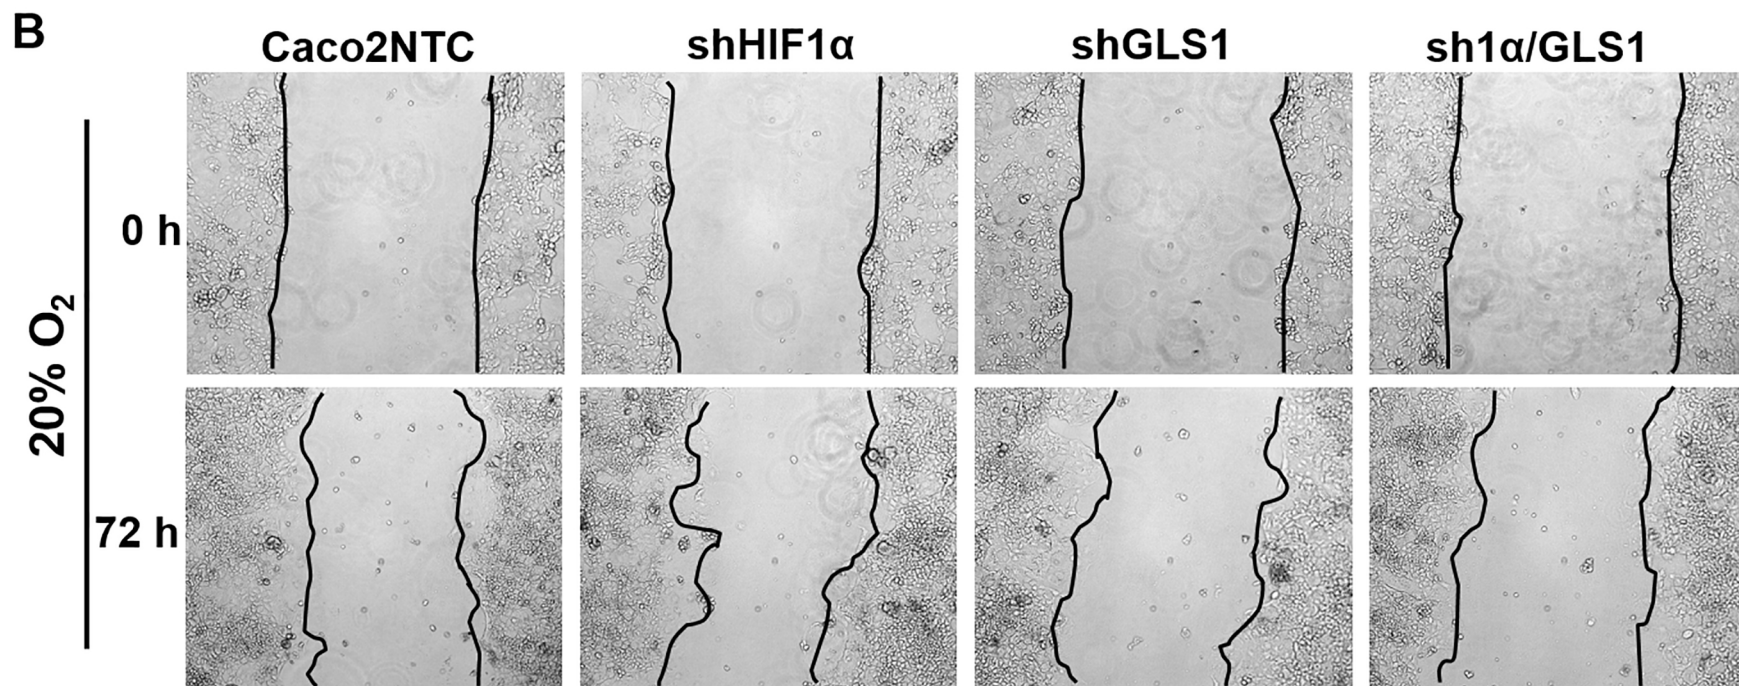

Figure S6

HT29

A

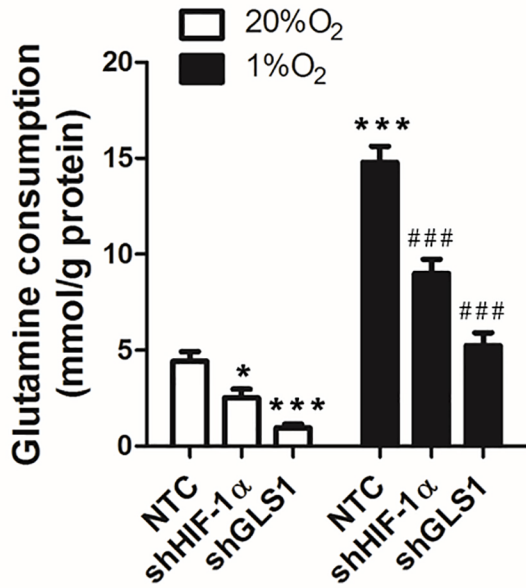

Caco2

B

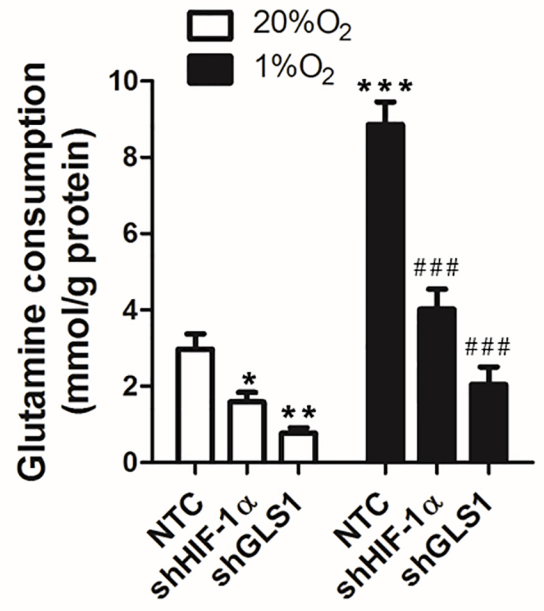

C

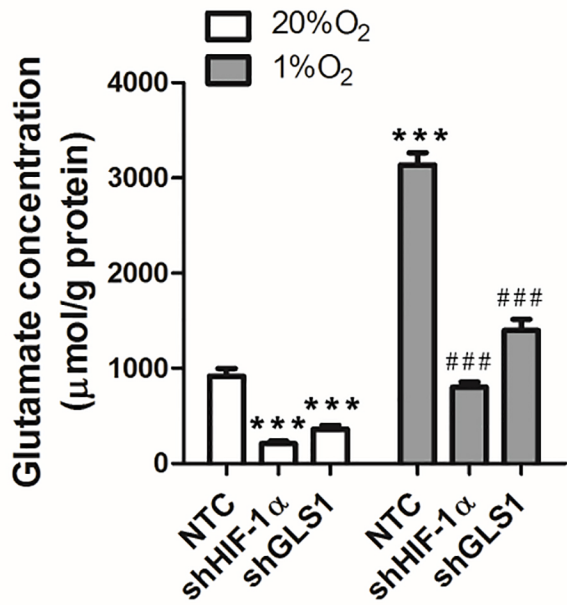

D

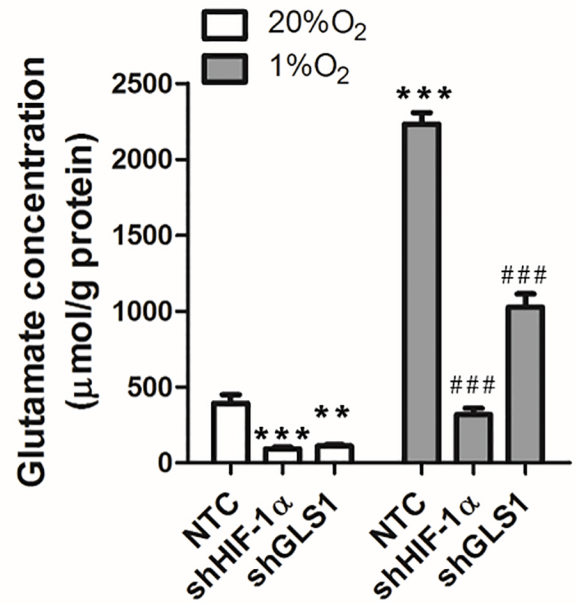

Figure S7

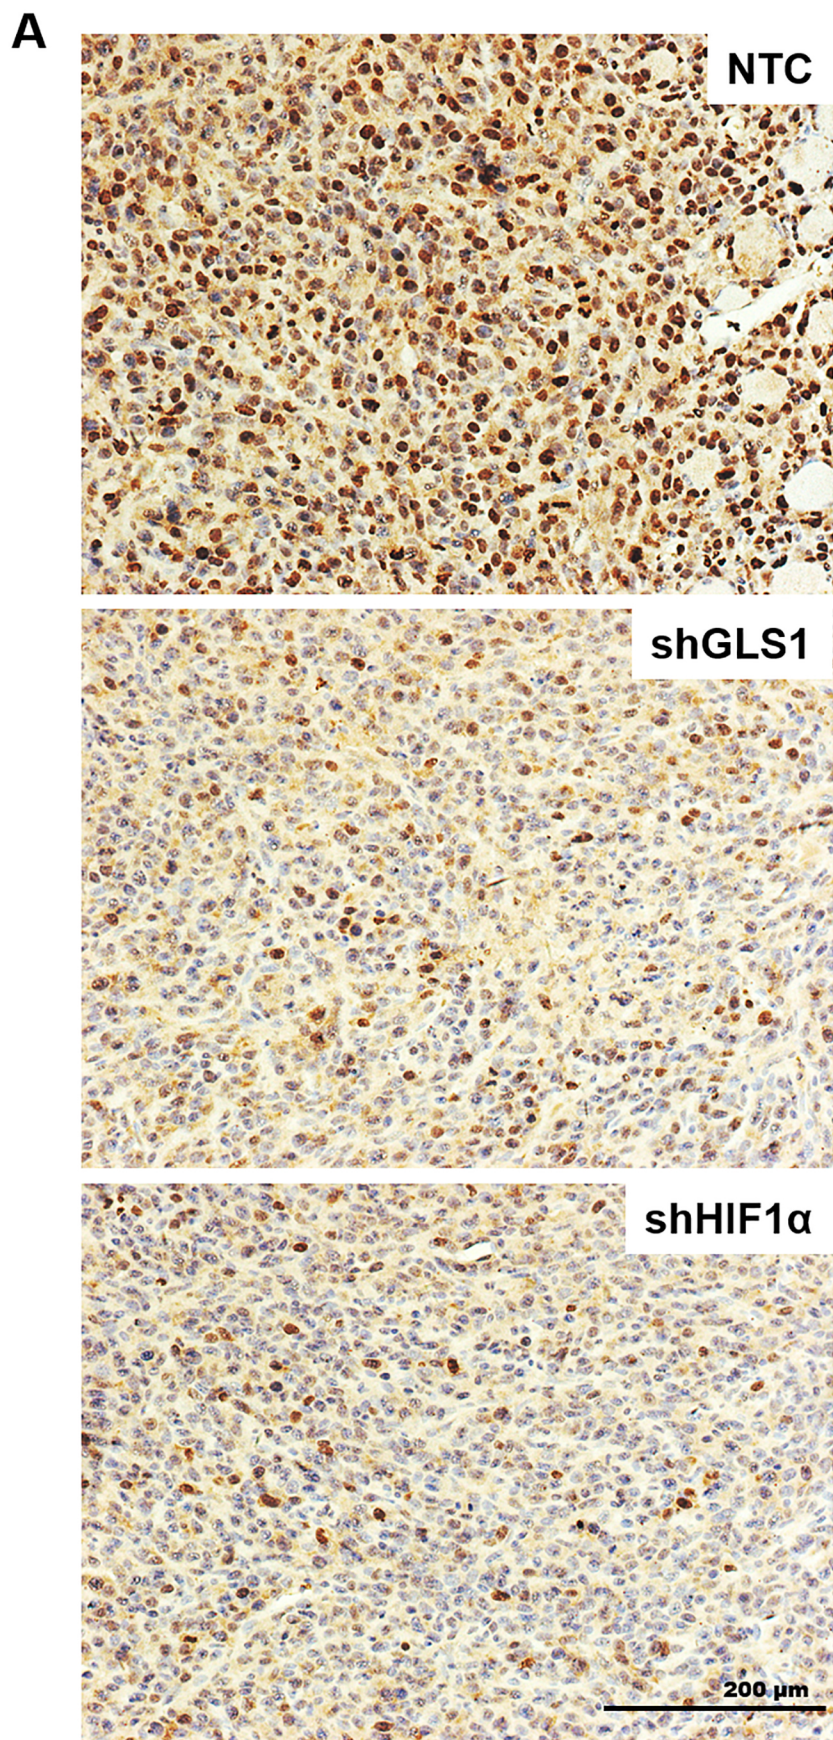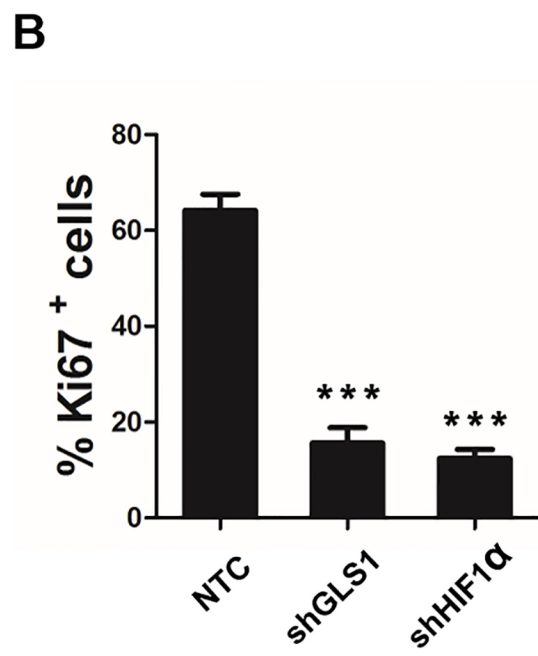

Figure S8
