# Supplementary material for: Glutaminase 1 expression in colorectal cancer cells is induced by hypoxia and required for tumor growth, invasion, and metastatic colonization
Source: PubMed Central journal article supplement (PMC6426853; doi:10.1038/s41419-018-1291-5), 2019-01-17
Supplement: 41419_2018_1291_MOESM3_ESM.pdf [file 41419_2018_1291_MOESM3_ESM.pdf]

**Table S1** Relationship between GLS1 and GLS2 expression in tissue microarrays which contain a serial set of colorectal tissues

| Variables                 | Total | Number of patients  |           |              |                     |           |              |
|---------------------------|-------|---------------------|-----------|--------------|---------------------|-----------|--------------|
|                           |       | GLS1 expression (%) |           | $\chi^2$ (P) | GLS2 expression (%) |           | $\chi^2$ (P) |
|                           |       | Low                 | High      |              | Low                 | High      |              |
| Normal colorectal tissue  | 15    | 15 (100.0)          | 0 (0.0)   | <0.0001      | 7 (46.7)            | 8 (53.3)  | <0.0001      |
| Inflammatory hyperplasia  | 17    | 16 (94.1)           | 1 (5.9)   |              | 6 (35.2)            | 11 (64.7) |              |
| Colorectal adenoma        | 9     | 9 (100.0)           | 0 (0.0)   |              | 9 (100.0)           | 0 (0.0)   |              |
| Colorectal adenocarcinoma | 39    | 13 (33.3)           | 26 (66.7) |              | 39 (100.0)          | 0 (0.0)   |              |

**Table S2** Relationship between clinicopathological parameters of colon cancer cases and expression of GLS1

| Variables                          | Total | Number of patients (%) |                      | Chi-square test     |
|------------------------------------|-------|------------------------|----------------------|---------------------|
|                                    |       | GLS1 low expression    | GLS1 high expression | P value             |
| <b>Age (year)</b>                  |       |                        |                      |                     |
| <60                                | 38    | 13 (34.2)              | 25 (65.8)            | 0.052 <sup>a</sup>  |
| ≥60                                | 47    | 26 (55.3)              | 21 (44.7)            |                     |
| <b>Gender</b>                      |       |                        |                      |                     |
| Male                               | 50    | 21 (42.0)              | 29 (58.0)            | 0.391 <sup>a</sup>  |
| Female                             | 35    | 18 (51.4)              | 17 (48.6)            |                     |
| <b>Lymph node metastasis</b>       |       |                        |                      |                     |
| Present                            | 24    | 4 (16.7)               | 20 (83.3)            | 0.001 <sup>b</sup>  |
| Absent                             | 61    | 35 (57.4)              | 26 (42.6)            |                     |
| <b>Grade</b>                       |       |                        |                      |                     |
| well and moderately differentiated | 60    | 31 (51.7)              | 29 (48.3)            | 0.097 <sup>a</sup>  |
| poorly and non-differentiated      | 25    | 8 ( 32.0)              | 17 (68.0)            |                     |
| <b>Clinical stage</b>              |       |                        |                      |                     |
| early stage                        | 51    | 34 (66.7)              | 17 (33.3)            | <0.001 <sup>b</sup> |
| advanced stage                     | 34    | 5 ( 17.4)              | 29 (85.3)            |                     |

Median values were used as cut-off points for definition of age subgroups

a, Pearson Chi-Square Test; b, Fisher's Exact Test

**Table S3** *GLS1* gene expression is correlated with the expression of known HIF target genes in colorectal carcinomas

| <i>Category</i> | <i>HIF targets</i> |              |             |              |                |              |               |              |              |             | <i>Non-HIF target</i> |
|-----------------|--------------------|--------------|-------------|--------------|----------------|--------------|---------------|--------------|--------------|-------------|-----------------------|
| <i>GENE</i>     | <i>VEGFA</i>       | <i>PDGFB</i> | <i>LOX</i>  | <i>CXCR3</i> | <i>ANGPTL4</i> | <i>LICAM</i> | <i>SLC2A1</i> | <i>P4HA1</i> | <i>P4HA2</i> | <i>MET</i>  | <i>RPL4</i>           |
| <i>GLS1</i>     | ***                | **           | *           | **           | ***            | ***          | **            | <i>n.s.</i>  | ***          | ***         | <i>n.s.</i>           |
| <i>PDGFB</i>    | **                 | —            | ***         | **           | ***            | ***          | ***           | ***          | *            | <i>n.s.</i> | <i>n.s.</i>           |
| <i>LOX</i>      | <i>n.s.</i>        | ***          | —           | **           | ***            | ***          | ***           | ***          | ***          | <i>n.s.</i> | <i>n.s.</i>           |
| <i>MET</i>      | ***                | <i>n.s.</i>  | <i>n.s.</i> | <i>n.s.</i>  | **             | ***          | ***           | **           | <i>n.s.</i>  | —           | <i>n.s.</i>           |

\* $p < 0.05$ , \*\* $p < 0.01$ , \*\*\* $p < 0.001$ , *n.s.*, not significant, Pearson's correlation test of microarray data from The Cancer Genome Atlas (TCGA) dataset of 433 colorectal carcinomas.

**Table S4. Sequences of Oligonucleotide Primers Used for RT-qPCR and ChIP, Related to Methods.**

| <b>Primers used in qRT-PCR assays</b> | <b>Sequence</b>             |
|---------------------------------------|-----------------------------|
| Human-GLS1-FWD                        | tctacaggattgccaacgtct       |
| Human-GLS1-REV                        | ctttgtctagcatgacacccatct    |
| Human-GLS2-FWD                        | atcagaaagtggcatgctgt        |
| Human-GLS2-REV                        | gcctttagtgcagtggtgaa        |
| Human-HK2-FWD                         | ccagttcattcacatcatcag       |
| Human-HK2-REV                         | cttacacgaggtcacatagc        |
| Human and Mouse-18S-FWD               | cggcgacgaccattcgaac         |
| Human and Mouse-18S-REV               | gaatcgaaccctgattccccgctc    |
| Human-18S-FWD                         | gaggatgaggtggaacgtgt        |
| Human-18S-REV                         | agaagtgacgcagccctcta        |
| <b>Primers used in ChIP assays</b>    | <b>Sequence</b>             |
| PDK1-HRE-FWD                          | cgcgtttgattccgtg            |
| PDK1-HRE-REV                          | ccagttataatctgccttcctattatc |
| GLS1-HRE-FWD                          | tgcacctgacatacacccctt       |
| GLS1-HRE-REV                          | ctggtttcgagggatctgca        |
